# Supplementary material for: De Novo Transcriptome Analysis of Oncomelania hupensis after Molluscicide Treatment by Next-Generation Sequencing: Implications for Biology and Future Snail Interventions
Source: PLoS One. 2015 Mar 16;10(3):e0118673. doi: 10.1371/journal.pone.0118673 (PMC4361594; doi:10.1371/journal.pone.0118673)
Supplement: S2 Table — (XLSX) [file pone.0118673.s004.xlsx]

## Sheet: Sheet1
Table S2. Summary of the KEGG pathways of mapped unigenes of Oncomelania hupensis
Pathway	Unigenes with pathway annotation (4,686)	Pathway
Metabolic pathways	1311 (27.98%)	ko01100
Purine metabolism	357 (7.62%)	ko00230
Pyrimidine metabolism	279 (5.95%)	ko00240
Oxidative phosphorylation	200 (4.27%)	ko00190
Phosphatidylinositol signaling system	182 (3.88%)	ko04070
Protein processing in endoplasmic reticulum	167 (3.56%)	ko04141
Lysosome	167 (3.56%)	ko04142
Glycolysis / Gluconeogenesis	135 (2.88%)	ko00010
Arginine and proline metabolism	132 (2.82%)	ko00330
Wnt signaling pathway	122 (2.6%)	ko04310
N-Glycan biosynthesis	121 (2.58%)	ko00510
Inositol phosphate metabolism	120 (2.56%)	ko00562
Progesterone-mediated oocyte maturation	119 (2.54%)	ko04914
Pyruvate metabolism	109 (2.33%)	ko00620
RNA polymerase	106 (2.26%)	ko03020
Nucleotide excision repair	104 (2.22%)	ko03420
Glycerophospholipid metabolism	102 (2.18%)	ko00564
Phagosome	100 (2.13%)	ko04145
Endocytosis	100 (2.13%)	ko04144
Fatty acid metabolism	96 (2.05%)	ko00071
Valine, leucine and isoleucine degradation	95 (2.03%)	ko00280
Alanine, aspartate and glutamate metabolism	95 (2.03%)	ko00250
Propanoate metabolism	91 (1.94%)	ko00640
Peroxisome	91 (1.94%)	ko04146
mRNA surveillance pathway	89 (1.9%)	ko03015
Amino sugar and nucleotide sugar metabolism	87 (1.86%)	ko00520
Ubiquitin mediated proteolysis	85 (1.81%)	ko04120
Fructose and mannose metabolism	85 (1.81%)	ko00051
Spliceosome	84 (1.80%)	ko03040
MAPK signaling pathway	84 (1.80%)	ko04010
Glutathione metabolism	80 (1.71%)	ko00480
Starch and sucrose metabolism	79 (1.69%)	ko00500
RNA transport	79 (1.69%)	ko03013
Homologous recombination	79 (1.69%)	ko03440
Pathways in cancer	78 (1.66%)	ko05200
Tryptophan metabolism	71 (1.52%)	ko00380
Oocyte meiosis	70 (1.49%)	ko04114
Arachidonic acid metabolism	70 (1.49%)	ko00590
Natural killer cell mediated cytotoxicity	68 (1.45%)	ko04650
Glycerolipid metabolism	68 (1.45%)	ko00561
TGF-beta signaling pathway	67 (1.43%)	ko04350
GnRH signaling pathway	66 (1.41%)	ko04912
Calcium signaling pathway	64 (1.37%)	ko04020
Focal adhesion	63 (1.34%)	ko04510
Fanconi anemia pathway	62 (1.32%)	ko03460
Citrate cycle (TCA cycle)	62 (1.32%)	ko00020
Ribosome	61 (1.3%)	ko03010
HTLV-I infection	61 (1.3%)	ko05166
Drug metabolism - other enzymes	61 (1.3%)	ko00983
Sphingolipid metabolism	60 (1.28%)	ko00600
Gap junction	59 (1.26%)	ko04540
Apoptosis	59 (1.26%)	ko04210
Pentose phosphate pathway	58 (1.24%)	ko00030
Pentose and glucuronate interconversions	58 (1.24%)	ko00040
Cysteine and methionine metabolism	58 (1.24%)	ko00270
Butanoate metabolism	58 (1.24%)	ko00650
beta-Alanine metabolism	58 (1.24%)	ko00410
Metabolism of xenobiotics by cytochrome P450	57 (1.22%)	ko00980
Lysine degradation	57 (1.22%)	ko00310
Base excision repair	57 (1.22%)	ko03410
Melanogenesis	55 (1.17%)	ko04916
Vascular smooth muscle contraction	54 (1.15%)	ko04270
Insulin signaling pathway	54 (1.15%)	ko04910
Herpes simplex infection	54 (1.15%)	ko05168
Galactose metabolism	54 (1.15%)	ko00052
Cell cycle	54 (1.15%)	ko04110
Mismatch repair	52 (1.11%)	ko03430
Glycosaminoglycan degradation	52 (1.11%)	ko00531
Glycine, serine and threonine metabolism	52 (1.11%)	ko00260
DNA replication	52 (1.11%)	ko03030
Aminoacyl-tRNA biosynthesis	52 (1.11%)	ko00970
Hedgehog signaling pathway	51 (1.09%)	ko04340
Drug metabolism - cytochrome P450	51 (1.09%)	ko00982
Tuberculosis	48 (1.02%)	ko05152
Regulation of actin cytoskeleton	47 (1%)	ko04810
Nicotinate and nicotinamide metabolism	46 (0.98%)	ko00760
Ribosome biogenesis in eukaryotes	45 (0.96%)	ko03008
Porphyrin and chlorophyll metabolism	44 (0.94%)	ko00860
Glycosylphosphatidylinositol(GPI)-anchor biosynthesis	44 (0.94%)	ko00563
Tyrosine metabolism	43 (0.92%)	ko00350
Glyoxylate and dicarboxylate metabolism	43 (0.92%)	ko00630
Histidine metabolism	42 (0.9%)	ko00340
Toll-like receptor signaling pathway	41 (0.87%)	ko04620
Phenylalanine metabolism	41 (0.87%)	ko00360
ABC transporters	41 (0.87%)	ko02010
Alzheimer's disease	40 (0.85%)	ko05010
Neuroactive ligand-receptor interaction	39 (0.83%)	ko04080
Small cell lung cancer	38 (0.81%)	ko05222
Mucin type O-Glycan biosynthesis	38 (0.81%)	ko00512
Dorso-ventral axis formation	38 (0.81%)	ko04320
Basal transcription factors	38 (0.81%)	ko03022
Jak-STAT signaling pathway	36 (0.77%)	ko04630
Toxoplasmosis	35 (0.75%)	ko05145
Nitrogen metabolism	35 (0.75%)	ko00910
Ether lipid metabolism	35 (0.75%)	ko00565
PPAR signaling pathway	34 (0.73%)	ko03320
mTOR signaling pathway	33 (0.7%)	ko04150
Bile secretion	33 (0.7%)	ko04976
Tight junction	32 (0.68%)	ko04530
p53 signaling pathway	32 (0.68%)	ko04115
Measles	31 (0.66%)	ko05162
Dopaminergic synapse	31 (0.66%)	ko04728
Selenocompound metabolism	30 (0.64%)	ko00450
Salivary secretion	30 (0.64%)	ko04970
Retinol metabolism	30 (0.64%)	ko00830
Phototransduction	30 (0.64%)	ko04744
Pantothenate and CoA biosynthesis	30 (0.64%)	ko00770
Long-term potentiation	30 (0.64%)	ko04720
Neurotrophin signaling pathway	29 (0.62%)	ko04722
Huntington's disease	29 (0.62%)	ko05016
Biosynthesis of secondary metabolites	29 (0.62%)	ko01110
Cytosolic DNA-sensing pathway	28 (0.6%)	ko04623
Chagas disease (American trypanosomiasis)	28 (0.6%)	ko05142
Salmonella infection	27 (0.58%)	ko05132
RNA degradation	27 (0.58%)	ko03018
Influenza A	27 (0.58%)	ko05164
ErbB signaling pathway	27 (0.58%)	ko04012
alpha-Linolenic acid metabolism	27 (0.58%)	ko00592
VEGF signaling pathway	26 (0.55%)	ko04370
Serotonergic synapse	26 (0.55%)	ko04726
RIG-I-like receptor signaling pathway	26 (0.55%)	ko04622
Notch signaling pathway	26 (0.55%)	ko04330
Biosynthesis of unsaturated fatty acids	26 (0.55%)	ko01040
Adipocytokine signaling pathway	26 (0.55%)	ko04920
Ubiquinone and other terpenoid-quinone biosynthesis	25 (0.53%)	ko00130
Terpenoid backbone biosynthesis	25 (0.53%)	ko00900
Glycosaminoglycan biosynthesis - chondroitin sulfate	25 (0.53%)	ko00532
Cholinergic synapse	25 (0.53%)	ko04725
Amoebiasis	25 (0.53%)	ko05146
NOD-like receptor signaling pathway	24 (0.51%)	ko04621
Gastric acid secretion	24 (0.51%)	ko04971
Ascorbate and aldarate metabolism	24 (0.51%)	ko00053
Linoleic acid metabolism	23 (0.49%)	ko00591
Hepatitis C	23 (0.49%)	ko05160
Glutamatergic synapse	23 (0.49%)	ko04724
Valine, leucine and isoleucine biosynthesis	22 (0.47%)	ko00290
Glycosphingolipid biosynthesis - lacto and neolacto series	22 (0.47%)	ko00601
Folate biosynthesis	22 (0.47%)	ko00790
Sulfur metabolism	21 (0.45%)	ko00920
Retrograde endocannabinoid signaling	21 (0.45%)	ko04723
Long-term depression	21 (0.45%)	ko04730
ECM-receptor interaction	21 (0.45%)	ko04512
Other glycan degradation	20 (0.43%)	ko00511
Glycosaminoglycan biosynthesis - heparan sulfate	20 (0.43%)	ko00534
Glioma	20 (0.43%)	ko05214
Fatty acid elongation	20 (0.43%)	ko00062
Adherens junction	20 (0.43%)	ko04520
Taurine and hypotaurine metabolism	19 (0.41%)	ko00430
Steroid biosynthesis	19 (0.41%)	ko00100
Phototransduction - fly	19 (0.41%)	ko04745
Pancreatic secretion	19 (0.41%)	ko04972
One carbon pool by folate	19 (0.41%)	ko00670
Fatty acid biosynthesis	19 (0.41%)	ko00061
Chemokine signaling pathway	19 (0.41%)	ko04062
Legionellosis	18 (0.38%)	ko05134
Cyanoamino acid metabolism	18 (0.38%)	ko00460
Synthesis and degradation of ketone bodies	17 (0.36%)	ko00072
Pertussis	17 (0.36%)	ko05133
Pancreatic cancer	17 (0.36%)	ko05212
Olfactory transduction	17 (0.36%)	ko04740
Phenylalanine, tyrosine and tryptophan biosynthesis	16 (0.34%)	ko00400
Other types of O-glycan biosynthesis	16 (0.34%)	ko00514
Colorectal cancer	16 (0.34%)	ko05210
Axon guidance	16 (0.34%)	ko04360
Transcriptional misregulation in cancer	15 (0.32%)	ko05202
Prostate cancer	15 (0.32%)	ko05215
Glycosphingolipid biosynthesis - globo series	15 (0.32%)	ko00603
Chronic myeloid leukemia	15 (0.32%)	ko05220
Steroid hormone biosynthesis	14 (0.3%)	ko00140
Parkinson's disease	14 (0.3%)	ko05012
Non-homologous end-joining	14 (0.3%)	ko03450
Vitamin digestion and absorption	13 (0.28%)	ko04977
Protein export	13 (0.28%)	ko03060
Protein digestion and absorption	13 (0.28%)	ko04974
Cardiac muscle contraction	13 (0.28%)	ko04260
Basal cell carcinoma	13 (0.28%)	ko05217
Amyotrophic lateral sclerosis (ALS)	13 (0.28%)	ko05014
Viral myocarditis	12 (0.26%)	ko05416
T cell receptor signaling pathway	12 (0.26%)	ko04660
SNARE interactions in vesicular transport	12 (0.26%)	ko04130
Osteoclast differentiation	12 (0.26%)	ko04380
Non-small cell lung cancer	12 (0.26%)	ko05223
Dilated cardiomyopathy	12 (0.26%)	ko05414
Vasopressin-regulated water reabsorption	11 (0.23%)	ko04962
Regulation of autophagy	11 (0.23%)	ko04140
Glycosphingolipid biosynthesis - ganglio series	11 (0.23%)	ko00604
Bacterial invasion of epithelial cells	11 (0.23%)	ko05100
B cell receptor signaling pathway	11 (0.23%)	ko04662
Renal cell carcinoma	10 (0.21%)	ko05211
Fc gamma R-mediated phagocytosis	10 (0.21%)	ko04666
Fc epsilon RI signaling pathway	10 (0.21%)	ko04664
Fat digestion and absorption	10 (0.21%)	ko04975
Endometrial cancer	10 (0.21%)	ko05213
Type II diabetes mellitus	9 (0.19%)	ko04930
Melanoma	9 (0.19%)	ko05218
Lipoic acid metabolism	9 (0.19%)	ko00785
Leukocyte transendothelial migration	9 (0.19%)	ko04670
Leishmaniasis	9 (0.19%)	ko05140
GABAergic synapse	9 (0.19%)	ko04727
Endocrine and other factor-regulated calcium reabsorption	9 (0.19%)	ko04961
Synaptic vesicle cycle	8 (0.17%)	ko04721
Riboflavin metabolism	8 (0.17%)	ko00740
Prion diseases	8 (0.17%)	ko05020
Malaria	8 (0.17%)	ko05144
Circadian rhythm - mammal	8 (0.17%)	ko04710
Bladder cancer	8 (0.17%)	ko05219
Antigen processing and presentation	8 (0.17%)	ko04612
Aldosterone-regulated sodium reabsorption	8 (0.17%)	ko04960
Renin-angiotensin system	7 (0.15%)	ko04614
Proteasome	7 (0.15%)	ko03050
Microbial metabolism in diverse environments	7 (0.15%)	ko01120
Lysine biosynthesis	7 (0.15%)	ko00300
Glycosaminoglycan biosynthesis - keratan sulfate	7 (0.15%)	ko00533
Cytokine-cytokine receptor interaction	7 (0.15%)	ko04060
Carbohydrate digestion and absorption	7 (0.15%)	ko04973
Arrhythmogenic right ventricular cardiomyopathy (ARVC)	7 (0.15%)	ko05412
Acute myeloid leukemia	7 (0.15%)	ko05221
Thyroid cancer	6 (0.13%)	ko05216
Primary bile acid biosynthesis	6 (0.13%)	ko00120
Hypertrophic cardiomyopathy (HCM)	6 (0.13%)	ko05410
Cocaine addiction	6 (0.13%)	ko05030
Thiamine metabolism	5 (0.11%)	ko00730
Sulfur relay system	5 (0.11%)	ko04122
Rheumatoid arthritis	5 (0.11%)	ko05323
D-Glutamine and D-glutamate metabolism	5 (0.11%)	ko00471
Caffeine metabolism	5 (0.11%)	ko00232
Vitamin B6 metabolism	4 (0.09%)	ko00750
Systemic lupus erythematosus	4 (0.09%)	ko05322
Proximal tubule bicarbonate reclamation	4 (0.09%)	ko04964
Maturity onset diabetes of the young	4 (0.09%)	ko04950
Hematopoietic cell lineage	4 (0.09%)	ko04640
Circadian rhythm - fly	4 (0.09%)	ko04711
Type I diabetes mellitus	3 (0.06%)	ko04940
Methane metabolism	3 (0.06%)	ko00680
Collecting duct acid secretion	3 (0.06%)	ko04966
Taste transduction	2 (0.04%)	ko04742
Intestinal immune network for IgA production	2 (0.04%)	ko04672
D-Arginine and D-ornithine metabolism	2 (0.04%)	ko00472
Cell adhesion molecules (CAMs)	2 (0.04%)	ko04514
Biotin metabolism	2 (0.04%)	ko00780
African trypanosomiasis	2 (0.04%)	ko05143
Vibrio cholerae infection	1 (0.02%)	ko05110
Staphylococcus aureus infection	1 (0.02%)	ko05150
Primary immunodeficiency	1 (0.02%)	ko05340
Mineral absorption	1 (0.02%)	ko04978
Meiosis - yeast	1 (0.02%)	ko04113
MAPK signaling pathway - yeast	1 (0.02%)	ko04011
MAPK signaling pathway - fly	1 (0.02%)	ko04013
D-Alanine metabolism	1 (0.02%)	ko00473
Butirosin and neomycin biosynthesis	1 (0.02%)	ko00524
