# Supplementary material for: De Novo Transcriptome Analysis of Oncomelania hupensis after Molluscicide Treatment by Next-Generation Sequencing: Implications for Biology and Future Snail Interventions
Source: PLoS One. 2015 Mar 16;10(3):e0118673. doi: 10.1371/journal.pone.0118673 (PMC4361594; doi:10.1371/journal.pone.0118673)
Supplement: S3 Table — (XLSX) [file pone.0118673.s005.xlsx]

## Sheet: Sheet1
Table S3. Unigenes differentially expressed between the H2O-treated and LDS-treated groups based on the RPKM value analysis
Gene Id	RPKM(sample_1)	RPKM(sample_2)	Fold_Change(sample_1_to_sample_2)	P_value(sample_1_to_sample_2)	Q_value(sample_1_to_sample_2)	Significant(sample_1_to_sample_2)
Unigene_100785	728.255	21.7772	-5.06355	7.18e-06	0.0207287	yes
Unigene_102081	61.554	0.224187	-8.10101	2.13e-06	0.00865525	yes
Unigene_114782	47.8485	3.08199	-3.95654	1.38e-05	0.0331813	yes
Unigene_117668	5.70504	0.308025	-4.21112	1.42e-05	0.0337544	yes
Unigene_130007	5.49236	0.0213865	-8.00458	2.93e-06	0.0108592	yes
Unigene_137077	0.684446	14.1286	4.36753	1.57e-05	0.0364401	yes
Unigene_139471	2.60857	0.0549045	-5.57019	6.51e-06	0.0196015	yes
Unigene_139472	3.77831	0.0580503	-6.02429	9.13e-07	0.00452881	yes
Unigene_148608	7.38502	0.0179904	-8.68123	3.51e-07	0.00212346	yes
Unigene_162844	34.4643	0.569764	-5.91859	6.16e-08	0.000510351	yes
Unigene_223788	0.295541	66.4332	7.8124	6.53e-09	8.98e-05	yes
Unigene_228726	429.502	24.4864	-4.13261	8.37e-06	0.0231486	yes
Unigene_237663	1.50808	58.6547	5.28146	1.7e-05	0.0387721	yes
Unigene_244055	6.11696	278.536	5.50891	7.33e-06	0.0209091	yes
Unigene_246793	0.239929	12.9635	5.7557	1.03e-08	0.00013609	yes
Unigene_248112	0.256443	11.0522	5.42955	8.56e-06	0.0232753	yes
Unigene_250953	0.619263	15.9639	4.68812	1.82e-06	0.00762689	yes
Unigene_255987	0.797152	44.6454	5.80751	6.25e-07	0.003404	yes
Unigene_257398	7.41674	99.4106	3.74454	1.08e-05	0.0281092	yes
Unigene_262072	51.7341	1043.16	4.3337	1.61e-05	0.0368197	yes
Unigene_270224	5.93646	206.309	5.11906	4.33e-10	8.74e-06	yes
Unigene_270225	4.83311	62.2914	3.68801	1.25e-05	0.0309614	yes
Unigene_279408	17.6993	215.602	3.6066	6.67e-06	0.019966	yes
Unigene_291298	0.320736	12.4634	5.28016	4.59e-08	0.000406247	yes
Unigene_291303	0.0510693	4.59322	6.49091	3.07e-07	0.00187439	yes
Unigene_291312	13.8301	720.695	5.7035	2.66e-09	4.47e-05	yes
Unigene_293220	0.527633	27.106	5.68293	1.54e-07	0.00111547	yes
Unigene_293941	0.359895	8.82319	4.61565	2.43e-06	0.00956206	yes
Unigene_302042	38.0072	895.92	4.55902	2.38e-05	0.0489986	yes
Unigene_305810	1.16171	32.4252	4.80279	2.3e-08	0.000231405	yes
Unigene_306582	0.244074	6.99257	4.84043	7.64e-06	0.021302	yes
Unigene_308675	3.7916	51.2254	3.75598	1.87e-06	0.00781682	yes
Unigene_310349	0.426625	7.43962	4.12419	1.2e-05	0.0303581	yes
Unigene_313329	0.73324	15.6086	4.41191	1.22e-06	0.00566216	yes
Unigene_394343	208.697	7335.15	5.13534	6.37e-09	8.96e-05	yes
Unigene_404538	147.231	5.22779	-4.81574	4.23e-07	0.00243512	yes
Unigene_414527	0.34635	11.1276	5.00577	1.19e-05	0.0303581	yes
Unigene_418638	5.44757	64.9366	3.57535	2.42e-05	0.0495983	yes
Unigene_424156	403.173	5232.45	3.69802	1.08e-05	0.028114	yes
Unigene_444775	1.16886	24.0861	4.36503	1.32e-05	0.03222	yes
Unigene_444891	24.5283	0.771615	-4.99042	2.3e-06	0.00920806	yes
Unigene_447984	8.3677	287.044	5.1003	8.68e-08	0.000656121	yes
Unigene_456132	24.7861	251.789	3.34461	2.18e-05	0.0466416	yes
Unigene_461503	1.53568	44.6644	4.86218	1.41e-08	0.000167004	yes
Unigene_473113	29.7375	543.362	4.19156	1.97e-06	0.00816228	yes
Sample 1 and sample 2 represents H2O-treated group and LDS-treated group, respectively.
Significant means the statistical difference based on Q_value ( Q < 0.05)
